# Supplementary material for: Recent advances in luminescent materials for super-resolution imaging via stimulated emission depletion nanoscopy
Source: Royal Society of Chemistry journal article supplement (doi:10.1039/d0cs00676a), 2020-12-14
Supplement: d0cs00676a1.pdf [file d0cs00676a1.pdf]

## Supporting Information

### **Recent advances in luminescent materials for super-resolution imaging *via* stimulated emission depletion nanoscopy**

Yanzi Xu,<sup>a,‡</sup> Ruohan Xu,<sup>a,‡</sup> Zhi Wang,<sup>a</sup> Yu Zhou,<sup>b</sup> Qifei Shen,<sup>a</sup> Wenchen Ji,<sup>d</sup>

Dongfeng Dang,<sup>a,\*</sup> Lingjie Meng,<sup>a,b\*</sup> and Ben Zhong Tang<sup>c\*</sup>

[a] School of Chemistry, Xi'an Key Laboratory of Sustainable Energy Material Chemistry, MOE Key Laboratory for Non-equilibrium Synthesis and Modulation of Condensed Matter, Xi'an Jiao Tong University, Xi'an 710049, P. R. China. E-mail: dongfengdang@mail.xjtu.edu.cn; menglingjie@xjtu.edu.cn

[b] Instrumental analysis center, Xi'an Jiao Tong University, Xi'an, 710049, P. R. China. E-mail: menglingjie@xjtu.edu.cn

[c] Department of Chemistry, The Hong Kong University of Science and Technology, Clear Water Bay, Kowloon, Hong Kong, P. R. China. E-mail: tangbenz@ust.hk

[d] Department of Orthopedics, the First Affiliated Hospital of Xi'an Jiaotong University, 710061, P.R. China.

Corresponding author: Prof. Dongfeng Dang,  
Prof. Lingjie Meng, and Prof. Ben Zhong Tang

E-mail: dongfengdang@mail.xjtu.edu.cn, menglingjie@xjtu.edu.cn, and  
tangbenz@ust.hk

Table S1. The resolutions in STED nanoscopy by using various fluorophores.

| Fluorophores                                       | Resolution |
|----------------------------------------------------|------------|
| Carbon dot <sup>a</sup>                            | 30 nm      |
| Up-conversion nanoparticles <sup>b</sup>           | 31.2 nm    |
| CsPbBr <sub>3</sub> QDs <sup>c</sup>               | 20.6 nm    |
| Fluorescent proteins <sup>d</sup>                  | 52 nm      |
| Rhodamines-based organic fluorophores <sup>e</sup> | 20 nm      |
| AIE fluorophores <sup>f</sup>                      | 31.2 nm    |

a: Nanoscale, 2014, 6, 8617; b: Nature, 2017, 543, 229; c: Advanced Materials, 2018, 30, 1800167; d: Proc. Natl. Acad. Sci. U. S. A., 2008, 105, 14271; e: Optical Nanoscopy, 2012, 1, 7; f: Advanced Materials, 2017, 29, 1703643.

Table S2. The resolution and STED depletion power for various fluorophores in STED imaging.

| Fluorophores                                            | Resolution (nm) | STED Power             |
|---------------------------------------------------------|-----------------|------------------------|
| Lanthanide-Doped Nanoparticles <sup>a</sup>             | 130             | 222 mW/cm <sup>2</sup> |
| CdSe QDs <sup>b</sup>                                   | 54              | 344 mW                 |
| fluorescent marker protein <sup>c</sup>                 | 70              | 32 mW                  |
| Conventional organic luminescent materials <sup>d</sup> | 40-60           | 14 mW                  |
| AIE luminogens <sup>e</sup>                             | 30.6            | 312.5 mW               |
| CsPbBr <sub>3</sub> QDs <sup>f</sup>                    | 20.6            | 5 mW                   |

a: Chemistry-a European Journal, 2014, 20, 146; b: Nature Communications, 2015, 6, 7127; c: Chemical Communications, 2017, 53, 979; d: Angewandte Chemie International Edition, 2016, 55, 3290; e: Advanced Materials, 2017, 29, 1703643; f: Advanced Materials, 2018, 30, 1800167.
